# Supplementary material
Source: PubMed Central journal article supplement (PMC7919101)

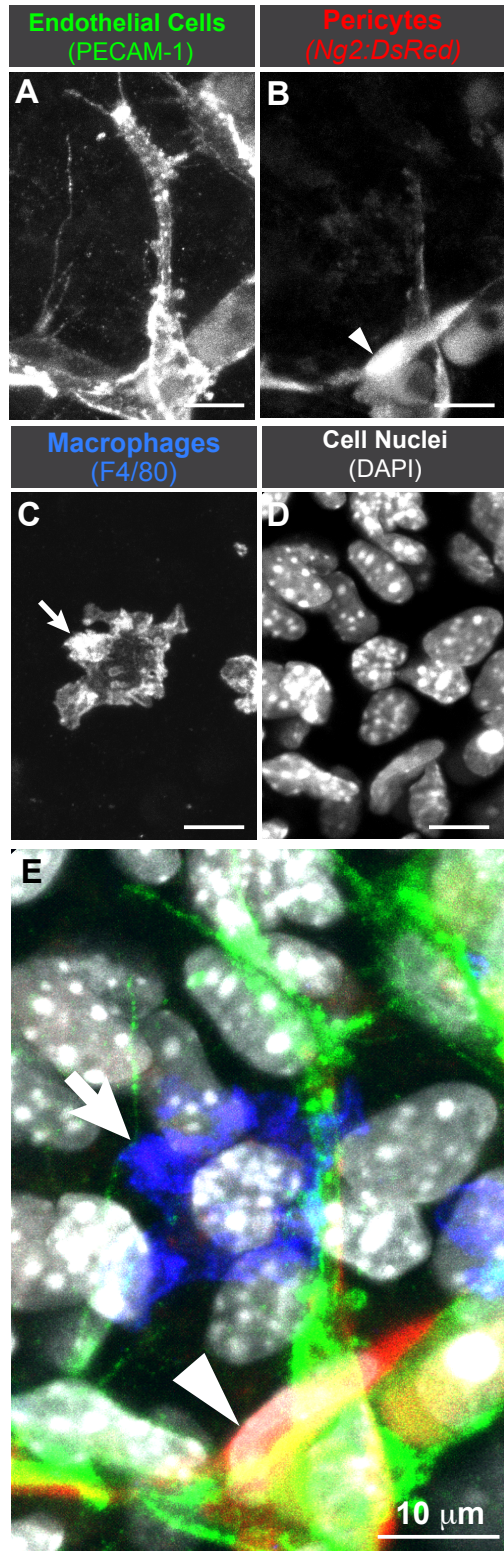

Supplement: darden-pc_migr_paper_suppfig01_zyaa027.pdf [file darden-pc_migr_paper_suppfig01_zyaa027.pdf]

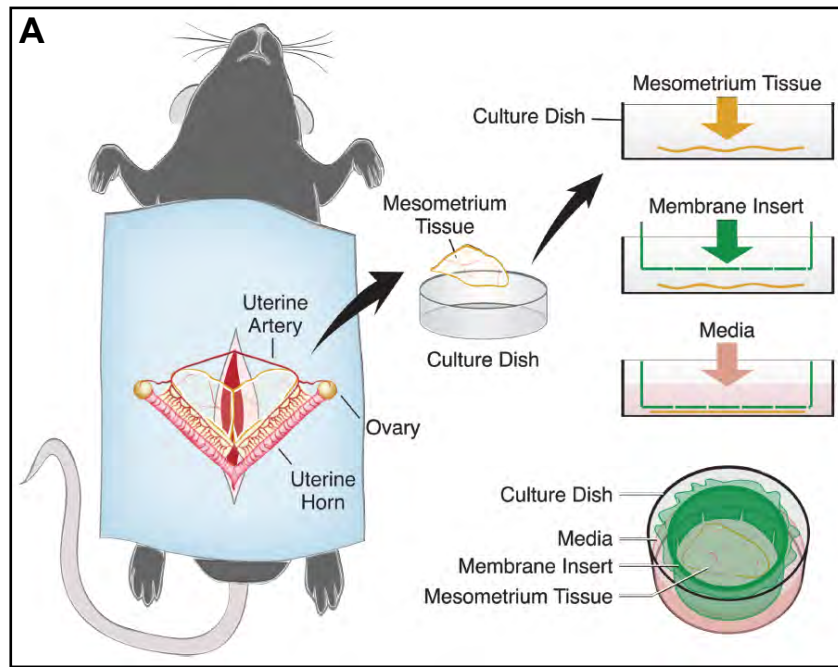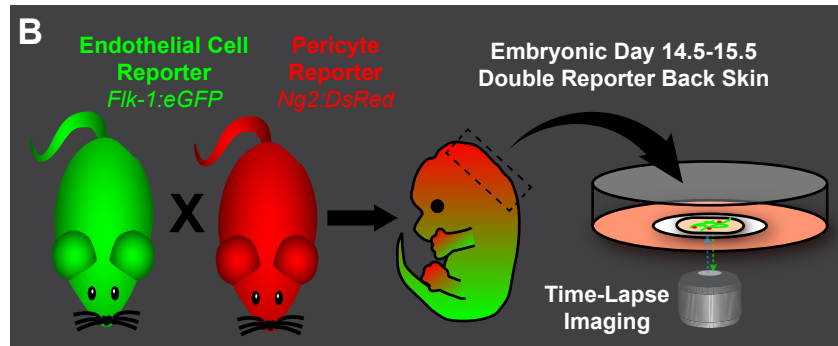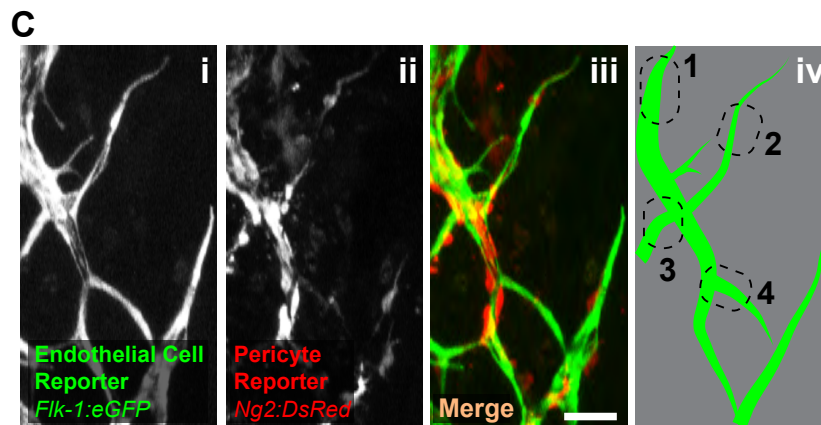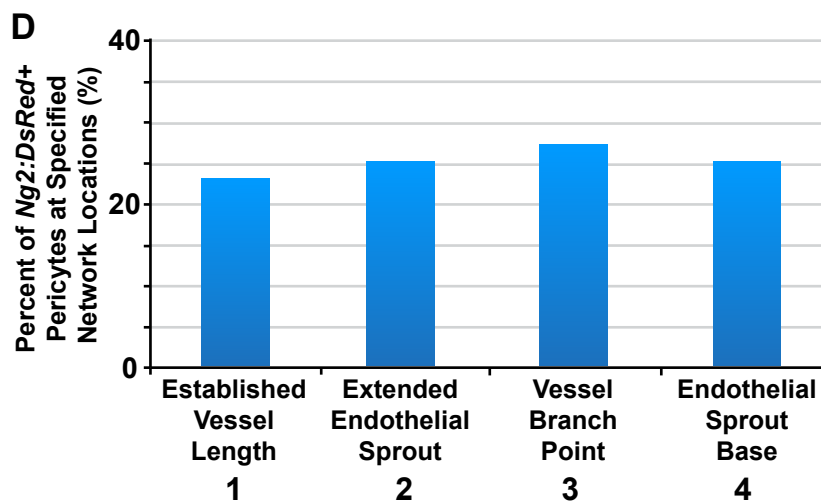

Supplement: darden-pc_migr_paper_suppfig02a_zyaa027.pdf [file darden-pc_migr_paper_suppfig02a_zyaa027.pdf]
